# Supplementary material
Source: PubMed Central journal article supplement (PMC5997501)
Supplement: NIHMS946504-supplement-Supp_PDF.pdf [file NIHMS946504-supplement-Supp_PDF.pdf]

# **SUPPLEMENTAL MATERIAL**

## **Associations of Fitness, Physical Activity, Strength and Genetic Risk with Cardiovascular Disease: Longitudinal Analyses in the UK Biobank Study**

Emmi Tikkanen, Stefan Gustafsson, Erik Ingelsson

## Supplemental Tables

| <b>Supplementary Table 1. Genetic variants included in the genetic risk score for coronary heart disease.</b> |                     |                         |               |
|---------------------------------------------------------------------------------------------------------------|---------------------|-------------------------|---------------|
| <b>SNP</b>                                                                                                    | <b>Gene</b>         | <b>Reference allele</b> | <b>Weight</b> |
| rs10840293                                                                                                    | SWAP70              | A                       | 1.06          |
| rs10947789                                                                                                    | KCNK5               | T                       | 1.05          |
| rs10953541                                                                                                    | 7q22                | C                       | 1.05          |
| rs11203042                                                                                                    | LIPA                | T                       | 1.04          |
| rs1122608                                                                                                     | LDLR                | G                       | 1.08          |
| rs11556924                                                                                                    | ZC3HC1              | C                       | 1.08          |
| rs11830157                                                                                                    | KSR2                | G                       | 1.04          |
| rs12190287                                                                                                    | TCF21               | C                       | 1.06          |
| rs12413409                                                                                                    | CYP17A1-CNNM2-NT5C2 | G                       | 1.08          |
| rs12526453                                                                                                    | PHACTR1             | C                       | 1.10          |
| rs12936587                                                                                                    | RAI1-PEMT-RASD1     | G                       | 1.03          |
| rs12976411                                                                                                    | ZNF507-LOC400684    | T                       | 0.95          |
| rs1412444                                                                                                     | LIPA                | T                       | 1.07          |
| rs1561198                                                                                                     | VAMP5-VAMP8-GGCX    | T                       | 1.06          |
| rs16986953                                                                                                    | AK097927            | A                       | 1.09          |
| rs17087335                                                                                                    | REST-NOA1           | T                       | 1.06          |
| rs17114036                                                                                                    | PPAP2B              | A                       | 1.13          |
| rs17464857                                                                                                    | MIA3                | T                       | 1.06          |
| rs17465637                                                                                                    | MIA3                | C                       | 1.08          |
| rs17514846                                                                                                    | FURIN-FES           | A                       | 1.05          |
| rs17609940                                                                                                    | ANKS1A              | G                       | 1.03          |
| rs1878406                                                                                                     | EDNRA               | T                       | 1.06          |
| rs2023938                                                                                                     | HDAC9               | C                       | 1.06          |
| rs2047009                                                                                                     | CXCL12              | G                       | 1.06          |
| rs2048327                                                                                                     | SLC22A3-LPAL2-LPA   | C                       | 1.06          |
| rs2075650                                                                                                     | APOE-APOC1          | G                       | 1.07          |
| rs216172                                                                                                      | SMG6                | C                       | 1.05          |
| rs2252641                                                                                                     | ZEB2-ACO74093.1     | C                       | 1.03          |
| rs2505083                                                                                                     | KIAA1462            | C                       | 1.06          |
| rs264                                                                                                         | LPL                 | G                       | 1.06          |
| rs273909                                                                                                      | SLC22A4-SLC22A5     | G                       | 1.06          |
| rs2895811                                                                                                     | HHIPL1              | C                       | 1.04          |
| rs2954029                                                                                                     | TRIB1               | A                       | 1.04          |
| rs3184504                                                                                                     | SH2B3               | T                       | 1.07          |
| rs3217992                                                                                                     | 9p21                | T                       | 1.14          |
| rs3798220                                                                                                     | SLC22A3-LPAL2-LPA   | C                       | 1.42          |

|            |                        |   |      |
|------------|------------------------|---|------|
| rs3918226  | NOS3                   | T | 1.14 |
| rs4252120  | PLG                    | T | 1.03 |
| rs445925   | APOE-APOC1             | G | 1.09 |
| rs46522    | UBE2Z                  | T | 1.04 |
| rs4773144  | COL4A1/A2              | G | 1.05 |
| rs4845625  | IL6R                   | T | 1.05 |
| rs4977574  | 9p21                   | G | 1.21 |
| rs501120   | CXCL12                 | T | 1.08 |
| rs515135   | APOB                   | C | 1.07 |
| rs56062135 | SMAD3                  | C | 1.07 |
| rs579459   | ABO                    | C | 1.08 |
| rs646776   | SORT1                  | T | 1.11 |
| rs6544713  | ABCG5-ABCG8            | T | 1.05 |
| rs663129   | PMAIP1-MC4R            | A | 1.06 |
| rs6725887  | WDR12                  | C | 1.14 |
| rs6903956  | ADTRP-C6orf105         | A | 1.00 |
| rs7136259  | ATP2B1                 | T | 1.04 |
| rs7173743  | ADAMTS7                | T | 1.08 |
| rs7692387  | GUCY1A3                | G | 1.07 |
| rs8042271  | MFGE8-ABHD2            | G | 1.10 |
| rs9319428  | FLT1                   | A | 1.04 |
| rs9515203  | COL4A1/A2              | T | 1.07 |
| rs964184   | ZNF259-APOA5-<br>APOA1 | G | 1.05 |
| rs974819   | PDGFD                  | T | 1.07 |
| rs9818870  | MRAS                   | T | 1.07 |
| rs9982601  | KCNE2                  | T | 1.12 |

Data have been contributed by CARDIoGRAMplusC4D<sup>1</sup>.  
 SNP, single-nucleotide polymorphism.

**Supplementary Table 2. Genetic variants included in the genetic risk score for atrial fibrillation.**

| <b>SNP</b> | <b>Gene</b>        | <b>Reference allele</b> | <b>Weight</b> |
|------------|--------------------|-------------------------|---------------|
| rs11047543 | SOX5               | G                       | 1.14          |
| rs11264280 | KCNN3              | T                       | 1.12          |
| rs1152591  | SYNE2              | A                       | 1.09          |
| rs11598047 | NEURL1             | G                       | 1.18          |
| rs11718898 | CAND2              | C                       | 1.08          |
| rs12664873 | GJA1               | T                       | 1.08          |
| rs1997572  | CAV1/2             | G                       | 1.10          |
| rs2106261  | ZFH3               | T                       | 1.20          |
| rs2288327  | TTN/TTN-AS1        | G                       | 1.09          |
| rs2540949  | CEP68              | A                       | 1.08          |
| rs2967791  | KLHL3/WNT8A/FAM13B | T                       | 1.07          |
| rs337711   | KCNN2              | T                       | 1.07          |
| rs35176054 | SH3PXD2A           | A                       | 1.14          |
| rs3771537  | ANXA4/GMCL1        | A                       | 1.09          |
| rs4946333  | SLC35F1/PLN        | G                       | 1.08          |
| rs520525   | PRRX1              | A                       | 1.12          |
| rs6800541  | SCN10A             | T                       | 1.08          |
| rs6843082  | PITX2              | G                       | 1.45          |
| rs7026071  | C9orf3             | T                       | 1.09          |
| rs74022964 | HCN4               | T                       | 1.12          |
| rs7508     | ASAH1/PCM1         | A                       | 1.09          |
| rs75190942 | KCNJ5              | A                       | 1.17          |
| rs7915134  | SYNPO2L            | C                       | 1.12          |
| rs883079   | TBX5               | T                       | 1.11          |

Data have been contributed by AFGen Consortium<sup>2</sup>.  
SNP, single-nucleotide polymorphism.

| <b>Supplementary Table 3. Hazard ratios with 95% confidence intervals for CHD according to tertiles of genetic risk and grip strength, physical activity and cardiorespiratory fitness.</b> |                                  |                      |                      |
|---------------------------------------------------------------------------------------------------------------------------------------------------------------------------------------------|----------------------------------|----------------------|----------------------|
|                                                                                                                                                                                             | <b>HR (95% CI)</b>               |                      |                      |
| <b>GRS</b>                                                                                                                                                                                  | <b>Strength</b>                  |                      |                      |
|                                                                                                                                                                                             | <b>Low</b>                       | <b>Intermediate</b>  | <b>High</b>          |
| <b>Low</b>                                                                                                                                                                                  | 1 (ref)                          | 0.74 ( 0.66 , 0.83 ) | 0.57 ( 0.51 , 0.65 ) |
| <b>Intermediate</b>                                                                                                                                                                         | 1 (ref)                          | 0.81 ( 0.73 , 0.90 ) | 0.64 ( 0.58 , 0.72 ) |
| <b>High</b>                                                                                                                                                                                 | 1 (ref)                          | 0.80 ( 0.73 , 0.88 ) | 0.69 ( 0.62 , 0.75 ) |
|                                                                                                                                                                                             | <b>Physical activity</b>         |                      |                      |
| <b>Low</b>                                                                                                                                                                                  | 1 (ref)                          | 0.91 ( 0.82 , 1.01 ) | 0.86 ( 0.78 , 0.96 ) |
| <b>Intermediate</b>                                                                                                                                                                         | 1 (ref)                          | 0.83 ( 0.76 , 0.92 ) | 0.95 ( 0.87 , 1.04 ) |
| <b>High</b>                                                                                                                                                                                 | 1 (ref)                          | 0.85 ( 0.78 , 0.92 ) | 0.89 ( 0.82 , 0.96 ) |
|                                                                                                                                                                                             | <b>Cardiorespiratory fitness</b> |                      |                      |
| <b>Low</b>                                                                                                                                                                                  | 1 (ref)                          | 0.70 ( 0.50 , 0.98 ) | 0.43 ( 0.28 , 0.67 ) |
| <b>Intermediate</b>                                                                                                                                                                         | 1 (ref)                          | 0.71 ( 0.52 , 0.96 ) | 0.45 ( 0.30 , 0.65 ) |
| <b>High</b>                                                                                                                                                                                 | 1 (ref)                          | 0.65 ( 0.50 , 0.86 ) | 0.51 ( 0.38 , 0.69 ) |

Abbreviations: CHD, coronary heart disease; HR, hazard ratio; CI, confidence interval; GRS, genetic risk score.

| <b>Supplementary Table 4. Hazard ratios with 95% confidence intervals for AF according to tertiles of genetic risk and grip strength, physical activity and cardiorespiratory fitness.</b> |                                  |                      |                      |
|--------------------------------------------------------------------------------------------------------------------------------------------------------------------------------------------|----------------------------------|----------------------|----------------------|
|                                                                                                                                                                                            | <b>HR (95% CI)</b>               |                      |                      |
| <b>GRS</b>                                                                                                                                                                                 | <b>Strength</b>                  |                      |                      |
|                                                                                                                                                                                            | <b>Low</b>                       | <b>Intermediate</b>  | <b>High</b>          |
| <b>Low</b>                                                                                                                                                                                 | 1 (ref)                          | 0.67 ( 0.60 , 0.74 ) | 0.51 ( 0.45 , 0.57 ) |
| <b>Intermediate</b>                                                                                                                                                                        | 1 (ref)                          | 0.65 ( 0.60 , 0.72 ) | 0.54 ( 0.49 , 0.60 ) |
| <b>High</b>                                                                                                                                                                                | 1 (ref)                          | 0.71 ( 0.66 , 0.77 ) | 0.61 ( 0.56 , 0.67 ) |
|                                                                                                                                                                                            | <b>Physical activity</b>         |                      |                      |
| <b>Low</b>                                                                                                                                                                                 | 1 (ref)                          | 0.98 ( 0.89 , 1.09 ) | 0.91 ( 0.82 , 1.00 ) |
| <b>Intermediate</b>                                                                                                                                                                        | 1 (ref)                          | 0.89 ( 0.82 , 0.97 ) | 0.82 ( 0.75 , 0.89 ) |
| <b>High</b>                                                                                                                                                                                | 1 (ref)                          | 0.90 ( 0.83 , 0.97 ) | 0.90 ( 0.83 , 0.97 ) |
|                                                                                                                                                                                            | <b>Cardiorespiratory fitness</b> |                      |                      |
| <b>Low</b>                                                                                                                                                                                 | 1 (ref)                          | 0.68 ( 0.49 , 0.94 ) | 0.46 ( 0.30 , 0.71 ) |
| <b>Intermediate</b>                                                                                                                                                                        | 1 (ref)                          | 0.51 ( 0.39 , 0.68 ) | 0.38 ( 0.26 , 0.54 ) |
| <b>High</b>                                                                                                                                                                                | 1 (ref)                          | 0.51 ( 0.40 , 0.65 ) | 0.40 ( 0.30 , 0.55 ) |

Abbreviations: AF, atrial fibrillation; HR, hazard ratio; CI, confidence interval; GRS, genetic risk score.

## Supplemental Figures

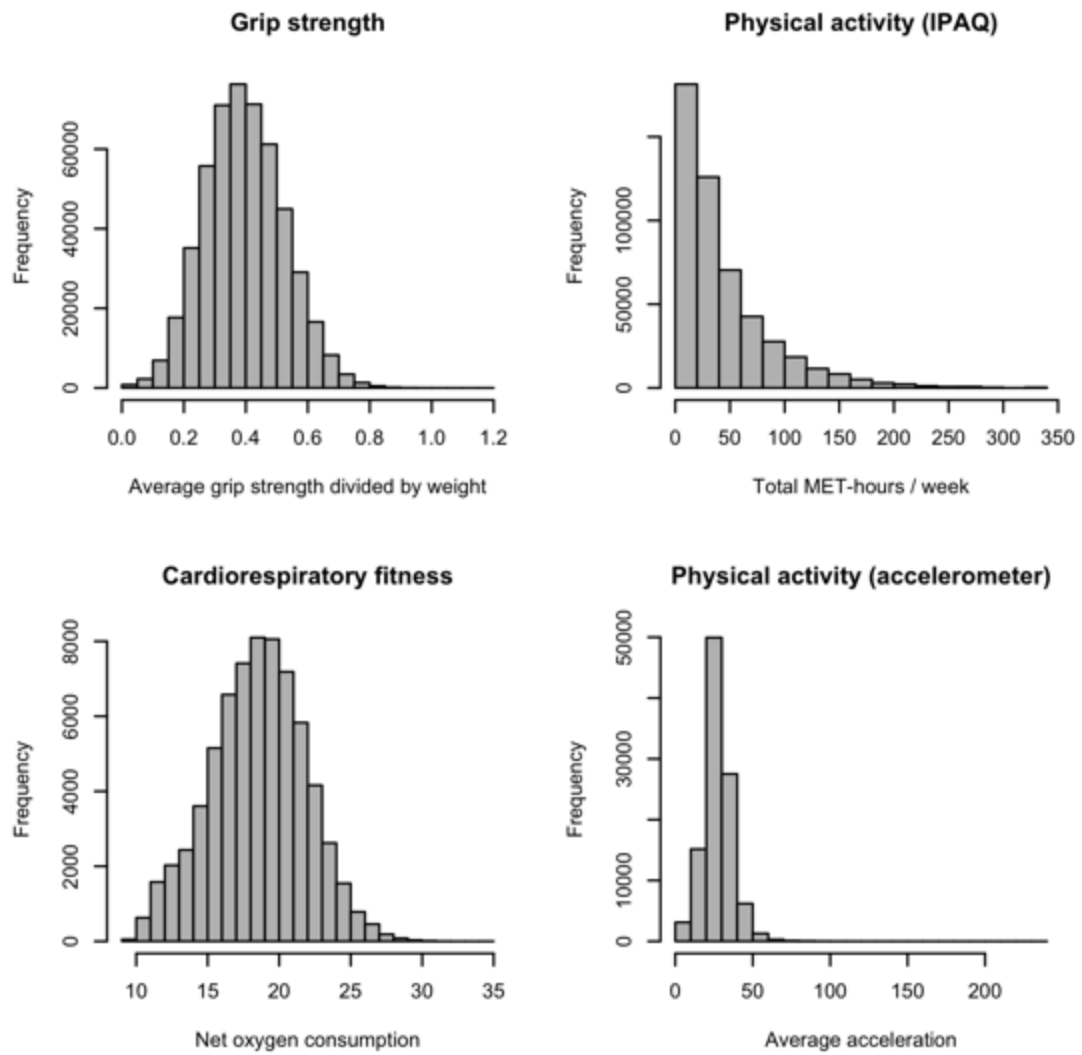

**Supplementary Figure 1. Distributions of fitness and physical activity variables.**

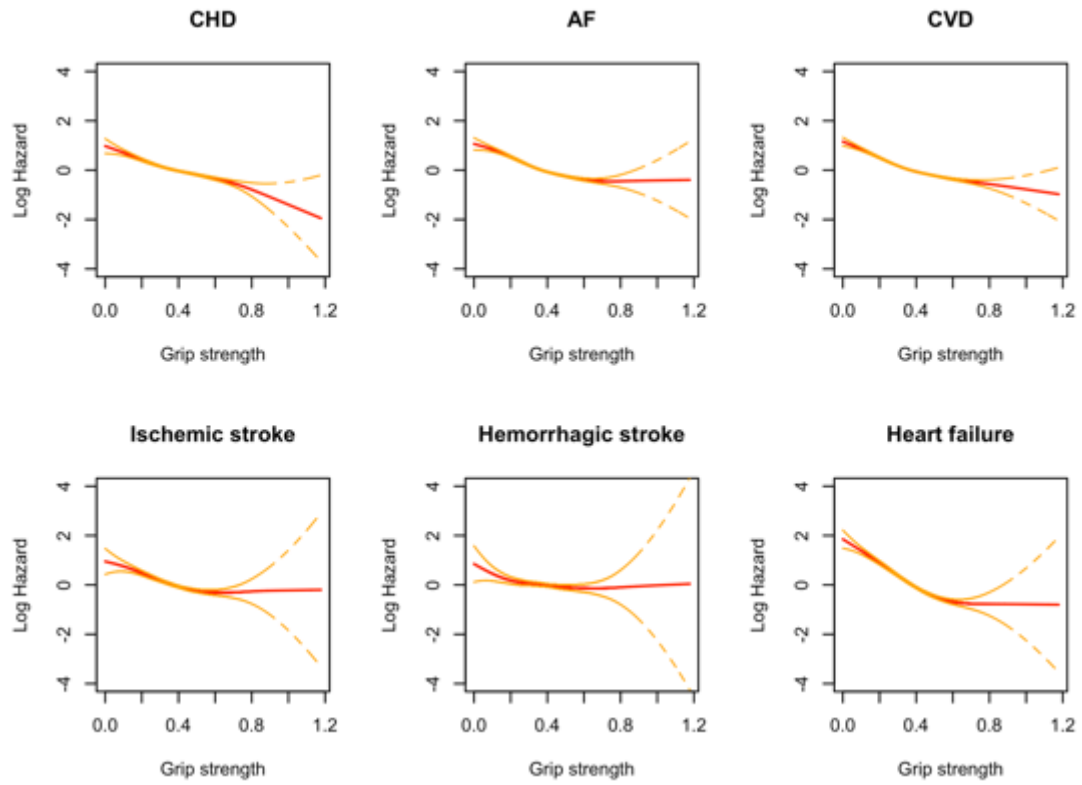

**Supplementary Figure 2. Relations of grip strength and cardiovascular disease (CVD) events. Lines are based on a regression spline of Cox proportional hazards. CHD, coronary heart disease; AF, atrial fibrillation.**

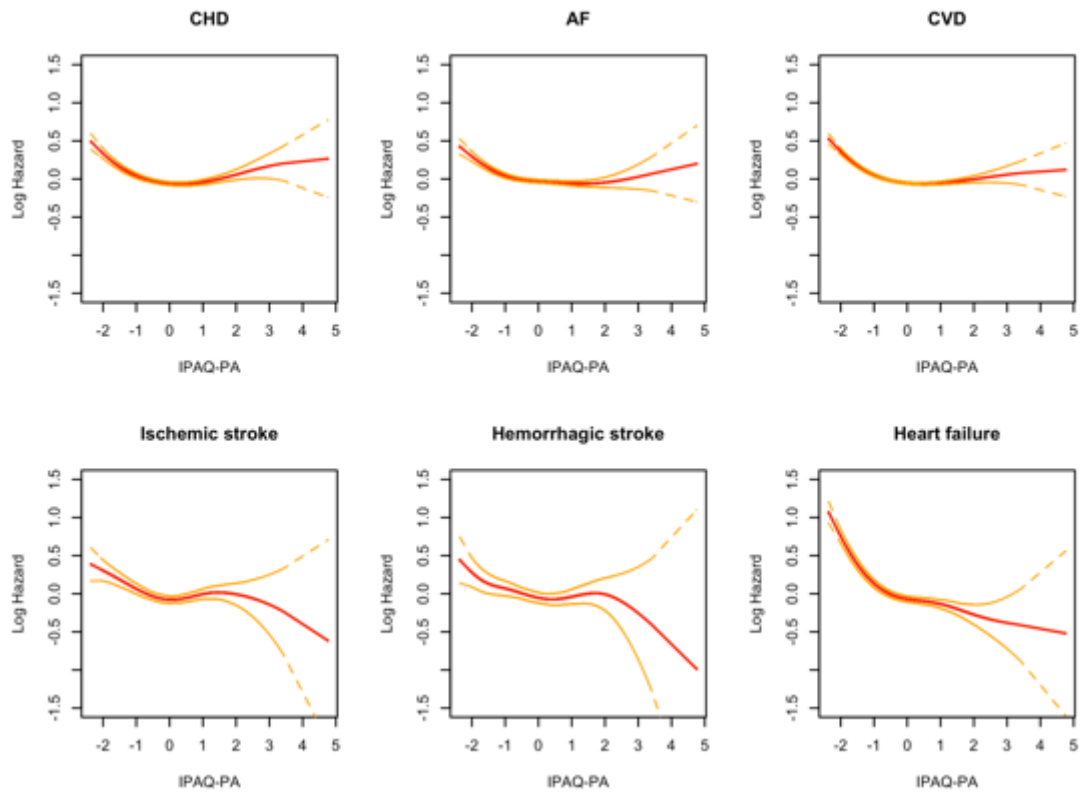

**Supplementary Figure 3. Relations of questionnaire-based physical activity (IPAQ-PA) and cardiovascular disease (CVD) events. Lines are based on a regression spline of Cox proportional hazards. CHD, coronary heart disease; AF, atrial fibrillation.**



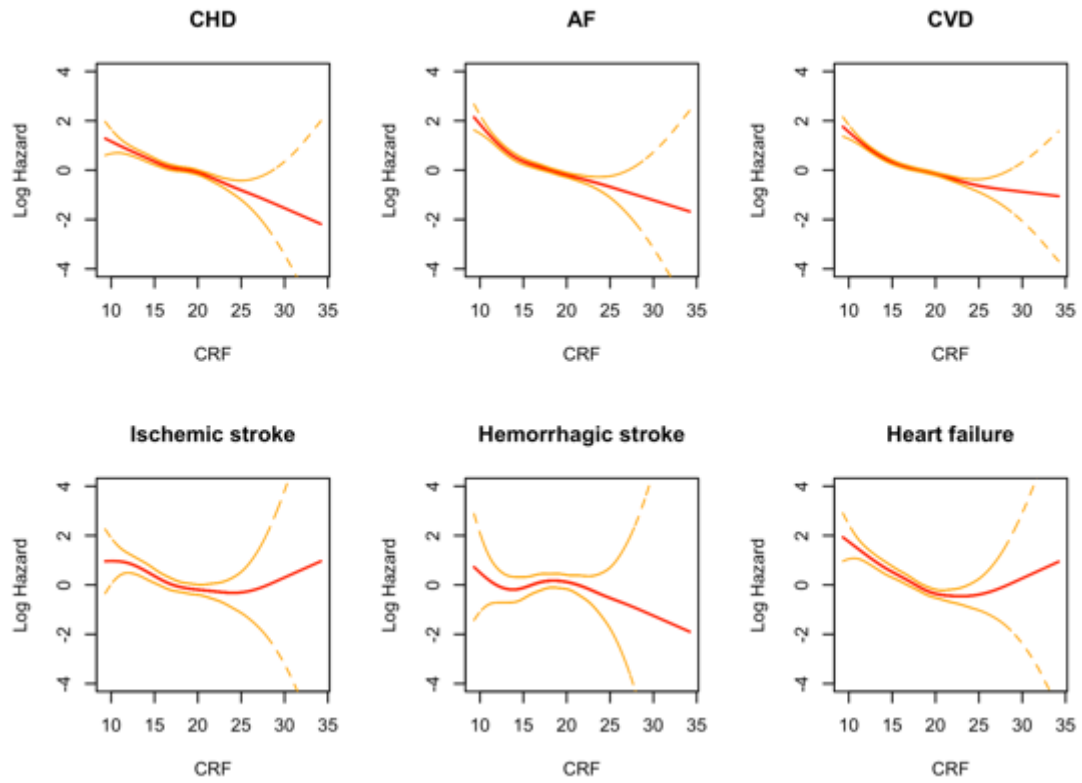

**Supplementary Figure 4. Relations of cardiorespiratory fitness (CRF) and cardiovascular disease (CVD) events. Lines are based on a regression spline of Cox proportional hazards. CHD, coronary heart disease; AF, atrial fibrillation.**

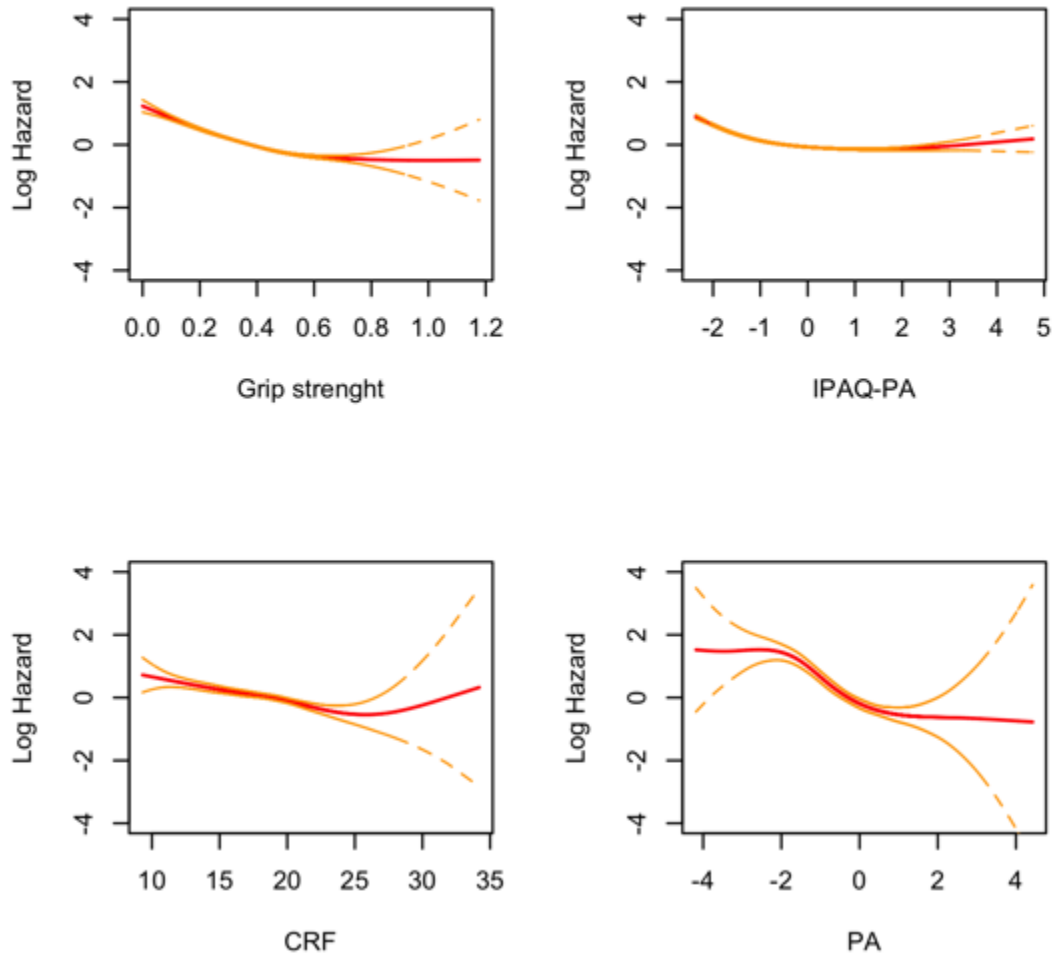

**Supplementary Figure 5. Relations of grip strength, questionnaire-based (IPAQ-PA) and objective (PA) physical activity, and cardiorespiratory fitness (CRF), and all-cause death. Lines are based on a regression spline of Cox proportional hazards.**

## Supplemental References

1. Nikpay M, Goel A, Won HH, Hall LM, Willenborg C, Kanoni S, Saleheen D, Kyriakou T, Nelson CP, Hopewell JC, Webb TR, Zeng L, Dehghan A, Alver M, Armasu SM, Auro K, Bjonnes A, Chasman DI, Chen S, Ford I, Franceschini N, Gieger C, Grace C, Gustafsson S, Huang J, Hwang SJ, Kim YK, Kleber ME, Lau KW, Lu X, Lu Y, Lytikainen LP, Mihailov E, Morrison AC, Pervjakova N, Qu L, Rose LM, Salfati E, Saxena R, Scholz M, Smith AV, Tikkanen E, Uitterlinden A, Yang X, Zhang W, Zhao W, de Andrade M, de Vries PS, van Zuydam NR, Anand SS, Bertram L, Beutner F, Dedoussis G, Frossard P, Gauguier D, Goodall AH, Gottesman O, Haber M, Han BG, Huang J, Jalilzadeh S, Kessler T, Konig IR, Lannfelt L, Lieb W, Lind L, Lindgren CM, Lokki ML, Magnusson PK, Mallick NH, Mehra N, Meitinger T, Memon FU, Morris AP, Nieminen MS, Pedersen NL, Peters A, Rallidis LS, Rasheed A, Samuel M, Shah SH, Sinisalo J, Stirrups KE, Trompet S, Wang L, Zaman KS, Ardisino D, Boerwinkle E, Borecki IB, Bottinger EP, Buring JE, Chambers JC, Collins R, Cupples LA, Danesh J, Demuth I, Elosua R, Epstein SE, Esko T, Feitosa MF, Franco OH, Franzosi MG, Granger CB, Gu D, Gudnason V, Hall AS, Hamsten A, Harris TB, Hazen SL, Hengstenberg C, Hofman A, Ingelsson E, Iribarren C, Jukema JW, Karhunen PJ, Kim BJ, Kooner JS, Kullo IJ, Lehtimaki T, Loos RJ, Melander O, Metspalu A, Marz W, Palmer CN, Perola M, Quertermous T, Rader DJ, Ridker PM, Ripatti S, Roberts R, Salomaa V, Sanghera DK, Schwartz SM, Seedorf U, Stewart AF, Stott DJ, Thiery J, Zalloua PA, O'Donnell CJ, Reilly MP, Assimes TL, Thompson JR, Erdmann J, Clarke R, Watkins H, Kathiresan S, McPherson R, Deloukas P, Schunkert H, Samani NJ, Farrall M, Consortium CAD. A comprehensive 1,000 genomes-based genome-wide association meta-analysis of coronary artery disease. *Nat Genet.* 2015; 47:1121-1130. doi: 10.1038/ng.3396.
2. AFGen Consortium, Metastroke Consortium of the ISGC, Neurology Working Group of the Charge Consortium. Large-scale analyses of common and rare variants identify 12 new loci associated with atrial fibrillation. *Nat Genet.* 2017; doi: 10.1038/ng.3843.
